# Supplementary material for: Activation and deprotection of F-BODIPYs using boron trihalides
Source: Royal Society of Chemistry journal article supplement (doi:10.1039/c4cc02706j), 2014-01-01

# Activation and Deprotection of *F*-BODIPYs using Boron Trihalides

Travis Lundrigan, T. Stanley Cameron and Alison Thompson\*

*Department of Chemistry, Dalhousie University, PO BOX 15000, 6274 Coburg Road,  
Halifax, Nova Scotia, B3H 4R2, Canada*

## Supporting Information

|                                                                                                                                                       |           |
|-------------------------------------------------------------------------------------------------------------------------------------------------------|-----------|
| <b>1.1 GENERAL EXPERIMENTAL PROCEDURES AND INFORMATION</b>                                                                                            | <b>2</b>  |
| <b>1.2 PROCEDURES AND CHARACTERIZATION DATA</b>                                                                                                       | <b>3</b>  |
| ( <i>Z</i> )-3-ethyl-5-((4-ethyl-3,5-dimethyl-2 <i>H</i> -pyrrol-2-ylidene)methyl)-2,4-dimethyl-1 <i>H</i> -pyrrole hydrochloride (2a)                | 3         |
| ( <i>Z</i> )-2-((4-ethyl-3,5-dimethyl-2 <i>H</i> -pyrrol-2-ylidene)methyl)-3,5-dimethyl-1 <i>H</i> -pyrrole hydrochloride (2b)                        | 3         |
| ( <i>Z</i> )-2-((3,5-dimethyl-2 <i>H</i> -pyrrol-2-ylidene)methyl)-3,5-dimethyl-1 <i>H</i> -pyrrole hydrochloride (2c)                                | 4         |
| ( <i>Z</i> )-1-(2-((4-heptanoyl-3,5-dimethyl-1 <i>H</i> -pyrrol-2-yl)methylene)-3,5-dimethyl-2 <i>H</i> -pyrrol-4-yl)heptan-1-one hydrochloride (2d)  | 4         |
| ( <i>Z</i> )-1-(2-((4-acetyl-3,5-dimethyl-1 <i>H</i> -pyrrol-2-yl)(phenyl)methylene)-3,5-dimethyl-2 <i>H</i> -pyrrol-4-yl)ethanone hydrochloride (2e) | 5         |
| ( <i>Z</i> )-3-ethyl-5-((4-ethyl-3,5-dimethyl-2 <i>H</i> -pyrrol-2-ylidene)(phenyl)methyl)-2,4-dimethyl-1 <i>H</i> -pyrrole hydrochloride (2f)        | 5         |
| ( <i>Z</i> )-ethyl 2-((3,4-dimethyl-1 <i>H</i> -pyrrol-2-yl)methylene)-3-ethyl-5-methyl-2 <i>H</i> -pyrrole-4-carboxylate hydrobromide (2g)           | 5         |
| 1,3,5,7-Tetramethyl-2,6-diethyl-8- <i>H</i> -4,4'-dibromo-bora-3a,4a-diaza- <i>s</i> -indacene (3a)                                                   | 6         |
| ( <i>Z</i> )-3-ethyl-5-((4-ethyl-3,5-dimethyl-2 <i>H</i> -pyrrol-2-ylidene)methyl)-2,4-dimethyl-1 <i>H</i> -pyrrole tetrafluoroborate (4a)            | 6         |
| ( <i>Z</i> )-2-((4-ethyl-3,5-dimethyl-2 <i>H</i> -pyrrol-2-ylidene)methyl)-3,5-dimethyl-1 <i>H</i> -pyrrole tetrafluoroborate (4b)                    | 7         |
| ( <i>Z</i> )-2-((3,5-dimethyl-2 <i>H</i> -pyrrol-2-ylidene)methyl)-3,5-dimethyl-1 <i>H</i> -pyrrole tetrafluoroborate (4c)                            | 7         |
| ( <i>Z</i> )-3-ethyl-5-((4-ethyl-3,5-dimethyl-2 <i>H</i> -pyrrol-2-ylidene)(phenyl)methyl)-2,4-dimethyl-1 <i>H</i> -pyrrole tetrafluoroborate (4d)    | 8         |
| ( <i>Z</i> )-2-(phenyl(2 <i>H</i> -pyrrol-2-ylidene)methyl)-1 <i>H</i> -pyrrole tetrafluoroborate (4e)                                                | 8         |
| 1,3,5,7-Tetramethyl-2,6-diethyl-8- <i>H</i> -4,4'-diethyl-bora-3a,4a-diaza- <i>s</i> -indacene (5a)                                                   | 9         |
| <b>1.3 REFERENCES</b>                                                                                                                                 | <b>10</b> |
| <b>1.4 <sup>1</sup>H AND <sup>13</sup>C NMR SPECTRA</b>                                                                                               | <b>11</b> |
| ( <i>Z</i> )-2-((4-ethyl-3,5-dimethyl-2 <i>H</i> -pyrrol-2-ylidene)methyl)-3,5-dimethyl-1 <i>H</i> -pyrrole hydrochloride (2b)                        | 11        |
| ( <i>Z</i> )-1-(2-((4-heptanoyl-3,5-dimethyl-1 <i>H</i> -pyrrol-2-yl)methylene)-3,5-dimethyl-2 <i>H</i> -pyrrol-4-yl)heptan-1-one hydrochloride (2d)  | 12        |
| ( <i>Z</i> )-1-(2-((4-acetyl-3,5-dimethyl-1 <i>H</i> -pyrrol-2-yl)(phenyl)methylene)-3,5-dimethyl-2 <i>H</i> -pyrrol-4-yl)ethanone hydrochloride (2e) | 13        |
| ( <i>Z</i> )-ethyl 2-((3,4-dimethyl-1 <i>H</i> -pyrrol-2-yl)methylene)-3-ethyl-5-methyl-2 <i>H</i> -pyrrole-4-carboxylate hydrobromide (2g)           | 14        |
| 1,3,5,7-Tetramethyl-2,6-diethyl-8- <i>H</i> -4,4'-dibromo-bora-3a,4a-diaza- <i>s</i> -indacene (3a)                                                   | 15        |
| ( <i>Z</i> )-3-ethyl-5-((4-ethyl-3,5-dimethyl-2 <i>H</i> -pyrrol-2-ylidene)methyl)-2,4-dimethyl-1 <i>H</i> -pyrrole tetrafluoroborate (4a)            | 16        |

|                                                                                                                                                    |    |
|----------------------------------------------------------------------------------------------------------------------------------------------------|----|
| ( <i>Z</i> )-2-((4-ethyl-3,5-dimethyl-2 <i>H</i> -pyrrol-2-ylidene)methyl)-3,5-dimethyl-1 <i>H</i> -pyrrole tetrafluoroborate (4b)                 | 17 |
| ( <i>Z</i> )-2-((3,5-dimethyl-2 <i>H</i> -pyrrol-2-ylidene)methyl)-3,5-dimethyl-1 <i>H</i> -pyrrole tetrafluoroborate (4c)                         | 18 |
| ( <i>Z</i> )-3-ethyl-5-((4-ethyl-3,5-dimethyl-2 <i>H</i> -pyrrol-2-ylidene)(phenyl)methyl)-2,4-dimethyl-1 <i>H</i> -pyrrole tetrafluoroborate (4d) | 19 |
| ( <i>Z</i> )-2-(phenyl(2 <i>H</i> -pyrrol-2-ylidene)methyl)-1 <i>H</i> -pyrrole tetrafluoroborate (4e)                                             | 20 |

## 1.1 General Experimental Procedures and Information

All  $^1\text{H}$  NMR (500 MHz),  $^{13}\text{C}$  NMR (125 MHz) and  $^{11}\text{B}$  NMR (160 MHz) spectra were recorded using a 500 MHz spectrometer. Chemical shifts are expressed in parts per million (ppm) using the solvent signal [ $\text{CDCl}_3$  ( $^1\text{H}$  7.26 ppm;  $^{13}\text{C}$  71.16 ppm)] as an internal reference for  $^1\text{H}$  and  $^{13}\text{C}$  and  $\text{BF}_3\cdot\text{OEt}_2$  as an external reference for  $^{11}\text{B}$ . Splitting patterns are indicated as follows: br, broad; s, singlet; d, doublet; t, triplet; q, quartet; m, multiplet. All coupling constants ( $J$ ) are reported in Hertz (Hz). Mass spectra were obtained using ion trap (ESI) instruments operating in positive mode.

### General Procedure for the Synthesis of HX Salts, X = Cl, Br (GP1)

The *F*-BODIPY (50 mg) was dissolved in anhydrous dichloromethane (10 mL) and 1 eq of  $\text{BCl}_3$  (or  $\text{BBr}_3$ ) was added drop-wise from a 1.0 M solution in anhydrous hexanes. The reaction mixture was stirred for an hour to allow *in situ* formation of the *Cl*-BODIPY. The reaction mixture was then concentrated *in vacuo*. The residue was dissolved in a mixture of acetone:water (10:1) and the solution was stirred for 10 min. The reaction mixture was extracted into dichloromethane and the organic layer was dried over  $\text{Na}_2\text{SO}_4$ . The solution was then concentrated *in vacuo* to obtain the HX salt of the dipyrin.

### General Procedure for the Synthesis of $\text{HBF}_4$ Salts (GP2)

The *F*-BODIPY (50 mg) was dissolved in anhydrous dichloromethane (10 mL) and 1 eq of  $\text{BF}_3\cdot\text{OEt}_2$  was added drop-wise. The reaction mixture was stirred for 10 minutes and then 3 eq of water was added and the mixture was further stirred for 3 hours. The reaction

mixture was washed with water and the organic layer dried over Na<sub>2</sub>SO<sub>4</sub>. The solution was concentrated *in vacuo*. The resulting solid was washed with diethyl ether to remove any unreacted *F*-BODIPY, leaving an orange powder corresponding to the HBF<sub>4</sub> salt of the dipyrin.

## 1.2 Procedures and characterization Data

### (*Z*)-3-Ethyl-5-((4-ethyl-3,5-dimethyl-2*H*-pyrrol-2-ylidene)methyl)-2,4-dimethyl-1*H*-pyrrole hydrochloride (**2a**)

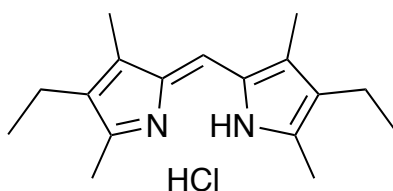

Using **GPI1**, compound **2a** was synthesized from the corresponding *F*-BODIPY.<sup>1</sup> Bright orange solid (48 mg, 99%).  $\delta_{\text{H}}$  (500 MHz, CDCl<sub>3</sub>) 13.36 (2H, br s), 7.00 (1H, s), 2.59 (6H, s), 2.40 (4H, q,  $J = 7.5$ ), 2.24 (6H, s), 1.05 (6H, t,  $J = 7.5$ ). Data matches that previously reported for this compound.<sup>4</sup>

### (*Z*)-2-((4-Ethyl-3,5-dimethyl-2*H*-pyrrol-2-ylidene)methyl)-3,5-dimethyl-1*H*-pyrrole hydrochloride (**2b**)

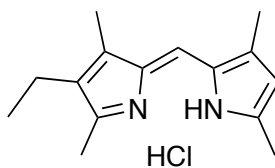

Using **GPI1**, compound **2b** was synthesized from the corresponding *F*-BODIPY.<sup>1</sup> Bright orange solid (48 mg, 99%).  $\delta_{\text{H}}$  (500 MHz, CDCl<sub>3</sub>) 13.71 (2H, br s), 7.02 (1H, s), 6.11 (1H, s), 2.63 (3H, s), 2.62 (3H, s), 2.42 (2H, q,  $J = 7.5$ ), 2.33 (3H, s), 2.26 (3H, s), 1.07 (3H, t,  $J = 7.5$ );  $\delta_{\text{C}}$  (125 MHz, CDCl<sub>3</sub>) 155.4, 148.8, 141.9, 139.1, 131.0, 126.84, 126.82, 119.4, 116.8, 17.4, 14.53, 14.51, 13.0, 12.2, 10.1. LRMS-ESI ( $m/z$ ): 229.2 [ $M + H$ ]<sup>+</sup>

;

HRMS-ESI (m/z):  $[M + H]^+$  calcd for  $C_{15}H_{21}N_2$  229.1699; found, 229.1691.

**(Z)-2-((3,5-Dimethyl-2H-pyrrol-2-ylidene)methyl)-3,5-dimethyl-1H-pyrrole hydrochloride (2c)**

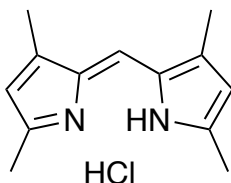

Using **GP1**, compound **2c** was synthesized from the corresponding *F*-BODIPY.<sup>2</sup> Bright orange solid (48 mg, 99%).  $\delta_H$  (500 MHz,  $CDCl_3$ ) 13.72 (2H, br s), 7.03 (1H, s), 6.13 (2H, s), 2.62 (6H, s), 2.32 (6H, s). Data matches that previously reported for this compound.<sup>5</sup>

**(Z)-1-(2-((4-Heptanoyl-3,5-dimethyl-1H-pyrrol-2-yl)methylene)-3,5-dimethyl-2H-pyrrol-4-yl)heptan-1-one hydrochloride (2d)**

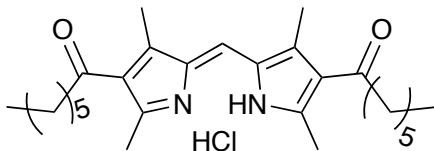

Using **GP1**, compound **2d** was synthesized from the corresponding *F*-BODIPY.<sup>3</sup> Bright orange solid (49 mg, 99%).  $\delta_H$  (500 MHz,  $CDCl_3$ ) 7.44 (1H, s), 3.00 (6H, s), 2.76 (4H, t,  $J = 7.2$ ), 2.51 (6H, s), 1.74-1.66 (4H, m), 1.39-1.28 (12H, m), 0.90 (6H, t,  $J = 6.6$ );  $\delta_C$  (125 MHz,  $CDCl_3$ ) 198.4, 165.7, 142.1, 136.8, 132.0, 123.1, 43.8, 31.9, 29.9, 24.2, 22.7, 17.5, 14.2, 12.4. LRMS-ESI (m/z): 425.3  $[M + H]^+$ ; HRMS-ESI (m/z):  $[M + H]^+$  calcd for  $C_{27}H_{41}N_2O_2$  425.3163; found, 425.3147.

**(Z)-1-(2-((4-Acetyl-3,5-dimethyl-1H-pyrrol-2-yl)(phenyl)methylene)-3,5-dimethyl-2H-pyrrol-4-yl)ethanone hydrochloride (2e)**

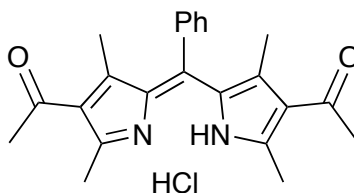

Using **GPI**, compound **2e** was synthesized from the corresponding *F*-BODIPY.<sup>3</sup> Bright orange solid (49 mg, 99%).  $\delta_{\text{H}}$  (500 MHz,  $\text{CDCl}_3$ ) 13.93 (2H, brs), 7.50-7.46 (3H, m), 7.30-7.28 (2H, m), 2.58 (6H, s), 2.39 (6H, s), 1.53 (6H, s);  $\delta_{\text{C}}$  (125 MHz,  $\text{CDCl}_3$ ) 196.7, 154.5, 143.7, 143.6, 137.2, 137.1, 131.0, 129.4, 129.3, 129.2, 31.8, 18.1, 14.5. LRMS-ESI (m/z): 361.2  $[\text{M} + \text{H}]^+$ ; HRMS-ESI (m/z):  $[\text{M} + \text{H}]^+$  calcd for  $\text{C}_{23}\text{H}_{25}\text{N}_2\text{O}_2$  361.1916; found, 361.1913.

**(Z)-3-Ethyl-5-((4-ethyl-3,5-dimethyl-2H-pyrrol-2-ylidene)(phenyl)methyl)-2,4-dimethyl-1H-pyrrole hydrochloride (2f)**

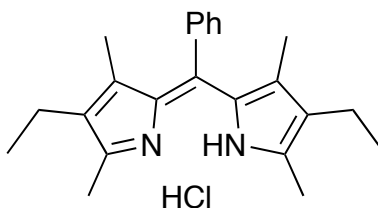

Using **GPI**, compound **2f** was synthesized from the corresponding *F*-BODIPY.<sup>1</sup> Bright orange solid (48 mg, 99%).  $\delta_{\text{H}}$  (500 MHz,  $\text{CDCl}_3$ ) 11.46 (2H, brs), 7.55-7.41 (3H, m), 7.26-7.25 (2H, m), 2.58 (6H, s), 2.33 (4H, q,  $J = 7.5$ ), 1.31 (6H, s), 0.99 (6H, t,  $J = 7.5$ ). Data matches that previously reported for this compound.<sup>2</sup>

**(Z)-Ethyl 2-((3,4-dimethyl-1H-pyrrol-2-yl)methylene)-3-ethyl-5-methyl-2H-pyrrole-4-carboxylate hydrobromide (2g)**

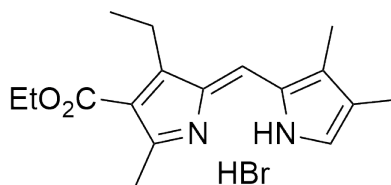

Using **GP1**, compound **2g** was synthesized from the corresponding *F*-BODIPY. Bright orange solid (55 mg, 99%).  $\delta_{\text{H}}$  (500 MHz,  $\text{CDCl}_3$ ) 13.73 (1H, br s), 13.35 (1H, br s), 7.76 (1H, d,  $J = 3.5$ ), 7.34 (1H, s), 4.36 (2H, q,  $J = 7.0$ ), 3.07 (2H, q,  $J = 7.5$ ), 2.96 (3H, s), 2.33 (3H, s), 2.10 (3H, s), 1.40 (3H, t,  $J = 7.0$ ), 1.27 (3H, t,  $J = 7.5$ );  $\delta_{\text{C}}$  (125 MHz,  $\text{CDCl}_3$ ) 163.2, 158.6, 155.6, 144.7, 144.5, 128.9, 126.6, 125.3, 122.9, 118.2, 60.7, 19.6, 16.9, 15.6, 14.4, 10.5, 10.2. LRMS-ESI ( $m/z$ ): 287.2  $[\text{M} + \text{H}]^+$ ; HRMS-ESI ( $m/z$ ):  $[\text{M} + \text{H}]^+$  calcd for  $\text{C}_{17}\text{H}_{23}\text{N}_2\text{O}_2$  287.1754; found, 287.1752.

**1,3,5,7-Tetramethyl-2,6-diethyl-8-*H*-4,4'-dibromo-bora-3a,4a-diaza-*s*-indacene (3a)**

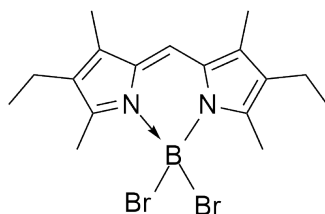

The analogous *F*-BODIPY (50 mg) was dissolved in anhydrous  $\text{CCl}_4$  (10 mL) and treated with 1 eq of  $\text{BBr}_3$ . The bright orange solution became dark red/purple in colour. The solution was concentrated *in vacuo* and compound **3a** was isolated as a dark red solid (70 mg, 99%).  $\delta_{\text{H}}$  (500 MHz,  $\text{CDCl}_3$ ) 7.02 (1H, s), 2.80 (6H, s), 2.40 (4H, q,  $J = 7.5$ ), 2.21 (6H, s), 1.08 (6H, t,  $J = 7.5$ );  $\delta_{\text{C}}$  (125 MHz,  $\text{CDCl}_3$ ) 154.2, 139.6, 134.1, 131.6, 119.4, 17.4, 14.7, 14.4, 10.2;  $\delta_{\text{B}}$  (160 MHz,  $\text{CDCl}_3$ ) -5.89 (s).

**(*Z*)-3-Ethyl-5-((4-ethyl-3,5-dimethyl-2*H*-pyrrol-2-ylidene)methyl)-2,4-dimethyl-1*H*-pyrrole tetrafluoroborate (4a)**

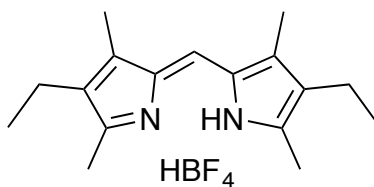

Using **GP2**, compound **4a** was synthesized from the corresponding *F*-BODIPY.<sup>1</sup> Bright orange solid (56 mg, 99%).  $\delta_{\text{H}}$  (500 MHz,  $\text{CDCl}_3$ ) 10.78 (2H, brs), 7.06 (1H, s), 2.55 (6H, s), 2.44 (4H, q,  $J = 7.5$ ), 2.28 (6H, s), 1.09 (6H, t,  $J = 7.5$ );  $\delta_{\text{C}}$  (125 MHz,  $\text{CDCl}_3$ ) 154.3, 142.6, 131.1, 126.9, 118.9, 17.4, 14.5, 12.8, 10.2;  $\delta_{\text{B}}$  (160 MHz,  $\text{CDCl}_3$ ) -0.65 (s);  $\delta_{\text{F}}$  (282 MHz,  $\text{CDCl}_3$ ) -155.1 (s). LRMS-ESI ( $m/z$ ): 87.0 [M].

**(Z)-2-((4-Ethyl-3,5-dimethyl-2*H*-pyrrol-2-ylidene)methyl)-3,5-dimethyl-1*H*-pyrrole tetrafluoroborate (4b)**

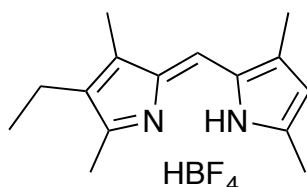

Using **GP2**, compound **4b** was synthesized from the corresponding *F*-BODIPY.<sup>1</sup> Bright orange solid (52 mg, 91%).  $\delta_{\text{H}}$  (500 MHz,  $\text{CDCl}_3$ ) 10.83 (1H, br s), 10.73 (1H, brs), 7.09 (1H, s), 6.19 (1H, s), 2.57 (6H, s, 2 x  $\text{CH}_3$ ), 2.45 (2H, q,  $J = 7.5$ ), 2.35 (3H, s), 2.29 (3H, s), 1.09 (3H, t,  $J = 7.5$ );  $\delta_{\text{C}}$  (125 MHz,  $\text{CDCl}_3$ ) 156.1, 154.8, 146.2, 143.5, 131.7, 127.30, 127.28, 119.5, 117.4, 17.5, 14.4, 12.9, 12.3, 10.2 (1C signal missing);  $\delta_{\text{B}}$  (160 MHz,  $\text{CDCl}_3$ ) -0.65 (s);  $\delta_{\text{F}}$  (282 MHz,  $\text{CDCl}_3$ ) -155.0 (s). LRMS-ESI ( $m/z$ ): 87.0 [M].

**(Z)-2-((3,5-Dimethyl-2*H*-pyrrol-2-ylidene)methyl)-3,5-dimethyl-1*H*-pyrrole tetrafluoroborate (4c)**

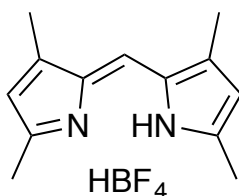

Using **GP2**, compound **4c** was synthesized from the corresponding *F*-BODIPY.<sup>2</sup> Bright orange solid (46 mg, 80%).  $\delta_{\text{H}}$  (500 MHz,  $\text{CDCl}_3$ ) 10.84 (2H, brs), 7.09 (1H, s), 6.21 (2H, s), 2.58 (6H, s), 2.34 (6H, s);  $\delta_{\text{C}}$  (125 MHz,  $\text{CDCl}_3$ ) 156.2, 147.4, 133.5, 127.6, 120.3,

14.5, 12.2;  $\delta_B$  (160 MHz,  $CDCl_3$ ) -0.65 (s);  $\delta_F$  (282 MHz,  $CDCl_3$ ) -154.9 (s). LRMS-ESI (m/z): 87.0 [M]<sup>-</sup>.

**(Z)-3-Ethyl-5-((4-ethyl-3,5-dimethyl-2H-pyrrol-2-ylidene)(phenyl)methyl)-2,4-dimethyl-1H-pyrrole tetrafluoroborate (4e)**

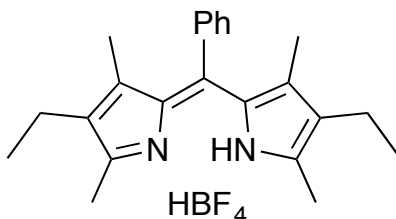

Using **GP2**, compound **4d** was synthesized from the corresponding *F*-BODIPY.<sup>1</sup> Bright orange solid (25 mg, 45%).  $\delta_H$  (500 MHz,  $CDCl_3$ ) 9.89 (2H, br s), 7.53-7.45 (3H, m), 7.35-7.31 (2H, m), 2.52 (6H, s), 2.41 (4H, q,  $J=7.5$ ), 1.45 (6H, s), 1.06 (6H, t,  $J=7.5$ );  $\delta_C$  (125 MHz,  $CDCl_3$ ) 153.7, 138.5, 136.6, 135.9, 133.8, 132.2, 129.3, 129.1, 128.3, 17.5, 14.3, 12.7, 12.1;  $\delta_B$  (160 MHz,  $CDCl_3$ ) -1.01 (s);  $\delta_F$  (282 MHz,  $CDCl_3$ ) -157.4 (s). LRMS-ESI (m/z): 87.0 [M]<sup>-</sup>.

**(Z)-2-(Phenyl(2H-pyrrol-2-ylidene)methyl)-1H-pyrrole tetrafluoroborate (4h)**

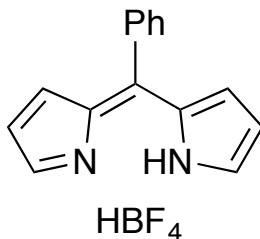

Using **GP2**, compound **4e** was synthesized from the corresponding *F*-BODIPY.<sup>1</sup> Bright orange solid (3 mg, 5%).  $\delta_H$  (500 MHz,  $CDCl_3$ ) 8.46 (2H, brs), 7.68 (2H, t,  $J=1.2$ ), 7.52-7.42 (5H, m), 6.62 (2H, dd,  $J=4.2, 1.2$ ), 6.41 (2H, dd,  $J=4.2, 1.5$ );  $\delta_C$  (125 MHz,  $CDCl_3$ ) 143.8, 142.7, 140.3, 137.4, 131.0, 129.5, 129.2, 127.7, 117.7;  $\delta_B$  (160 MHz,  $CDCl_3$ ) -1.00 (s);  $\delta_F$  (282 MHz,  $CDCl_3$ ) -157.0 (s). LRMS-ESI (m/z): 87.0 [M]<sup>-</sup>.



**(Z)-3-Ethyl-5-((4-ethyl-3,5-dimethyl-2H-pyrrol-2-ylidene)methyl)-2,4-dimethyl-1H-pyrrole hydrobromide (4a-HBr)**

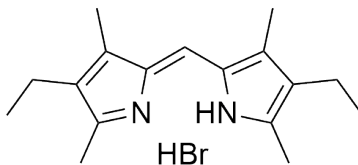

Compound **4a-HBF<sub>4</sub>** (50 mg) was dissolved in anhydrous dichloromethane (10 mL) and treated with excess (0.1 mL) aqueous HBr (48%). The resulting solution was stirred for 15 min and then washed with water. The organic layer was dried over Na<sub>2</sub>SO<sub>4</sub> and concentrated *in vacuo* to give **4a-HBr** as a bright orange solid (49 mg, 99%).  $\delta_{\text{H}}$  (500 MHz, CDCl<sub>3</sub>) 12.87 (2H, br s), 7.02 (1H, s), 2.66 (6H, s), 2.41 (4H, q,  $J = 7.5$ ), 2.26 (6H, s), 1.06 (6H, t,  $J = 7.5$ ). Data matches that previously reported for this compound.<sup>7</sup>

**1,3,5,7-Tetramethyl-2,6-diethyl-8-H-4,4'-diethyl-bora-3a,4a-diaza-s-indacene (5a)**

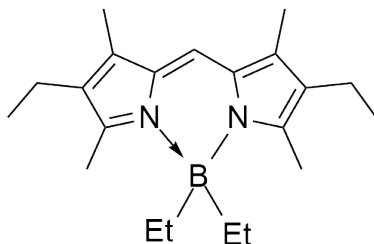

*F*-BODIPY **1a** (50 mg) was dissolved in anhydrous dichloromethane (10 mL) and treated with 1 eq of BF<sub>3</sub>·OEt<sub>2</sub>, followed by the addition of 2 eq of EtMgBr (3.0 M in THF) added drop-wise. The solution was then washed with water and the organic layer was dried over Na<sub>2</sub>SO<sub>4</sub> and concentrated *in vacuo* to give **5a** as a bright orange solid (53 mg, 99%).  $\delta_{\text{H}}$  (500 MHz, CDCl<sub>3</sub>) 6.99 (1H, s), 2.44-2.39 (10H, m, 2x(CH<sub>3</sub>+CH<sub>2</sub>)), 2.18 (6H, s), 1.06 (6H, t,  $J=7.6$ ), 0.82 (4H, q,  $J=7.6$ ), 0.31 (6H, t,  $J=7.6$ ). Compound has been previously characterized.<sup>6</sup>

### 1.3 References

- [1] Lundrigan, T.L.; Baker, A.E.G.; Longobardi, L.E.; Wood, T.E.; Smithen, D.A.; Crawford, S.M.; Cameron, T.S.; Thompson, A. *Org. Lett.* **2012**, *14*, 2158-2161.
- [2] Crawford, S.M.; Thompson, A. *Org. Lett.* **2010**, *12*, 1424-1427.
- [3] Smithen, D.A.; Baker, A.E.G.; Offman, M.; Crawford, S.M.; Cameron, T.S.; Thompson, A. *J. Org. Chem.* **2012**, *77*, 3439–3453
- [4] Tu, B.; Wang, C.; Ma, J. *Org. Prep. Proced. Int.*, **1999**, *31*, 349-352.
- [5] Sessler, J.L.; Eller, L.R.; Cho, W.-S.; Nicolaou, S.; Aguilar, A.; Lee, J.T.; Lynch, V.M.; Magda, D.J. *Angew. Chem.* **2005**, *117*, 6143–6146.
- [6] Lundrigan, T.L.; Crawford, S.M.; Cameron, T.S.; Thompson, A. *Chem. Commun.* **2012**, *48*, 1003-1005.
- [7] Semeikin, A.S.; Berezin, M.B.; Chernova, O.M.; Antina, E.V.; Syrbu, S.A.; Lyubimova, T.V.; Kutepov, A.M. *Russ.Chem.Bull., Int.Ed.*, **2003**, *52*, 1807-1813.

## 1.4 $^1\text{H}$ and $^{13}\text{C}$ NMR Spectra

### (*Z*)-2-((4-Ethyl-3,5-dimethyl-2*H*-pyrrol-2-ylidene)methyl)-3,5-dimethyl-1*H*-pyrrole hydrochloride (**2b**)

$^1\text{H}$  NMR Spectrum in  $\text{CDCl}_3$

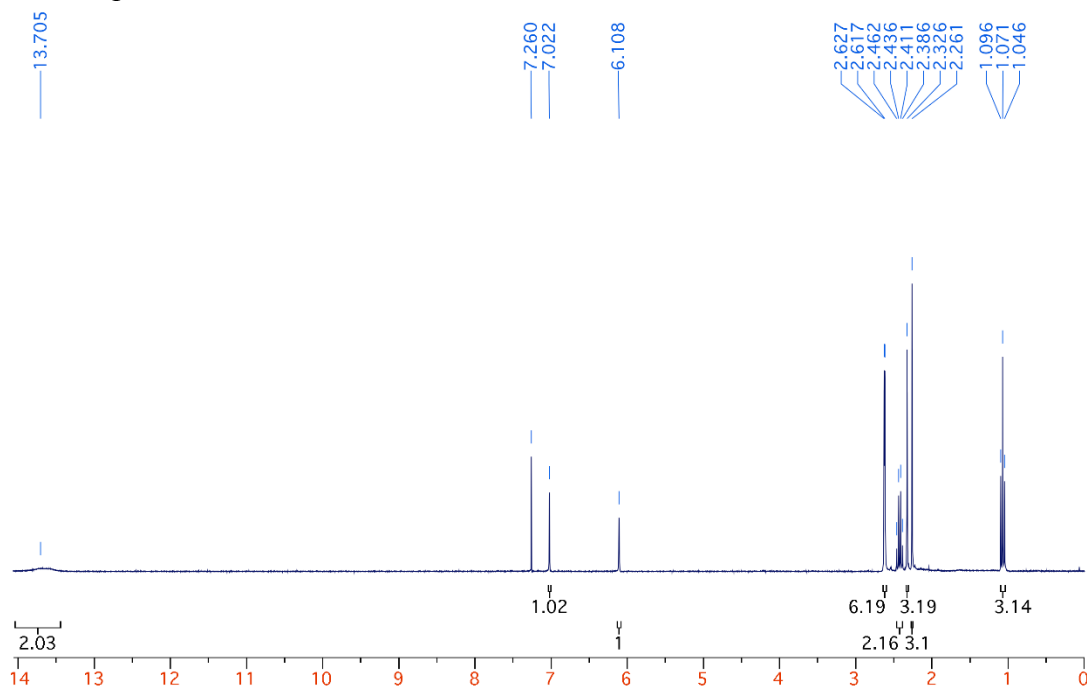

$^{13}\text{C}$  NMR Spectrum in  $\text{CDCl}_3$

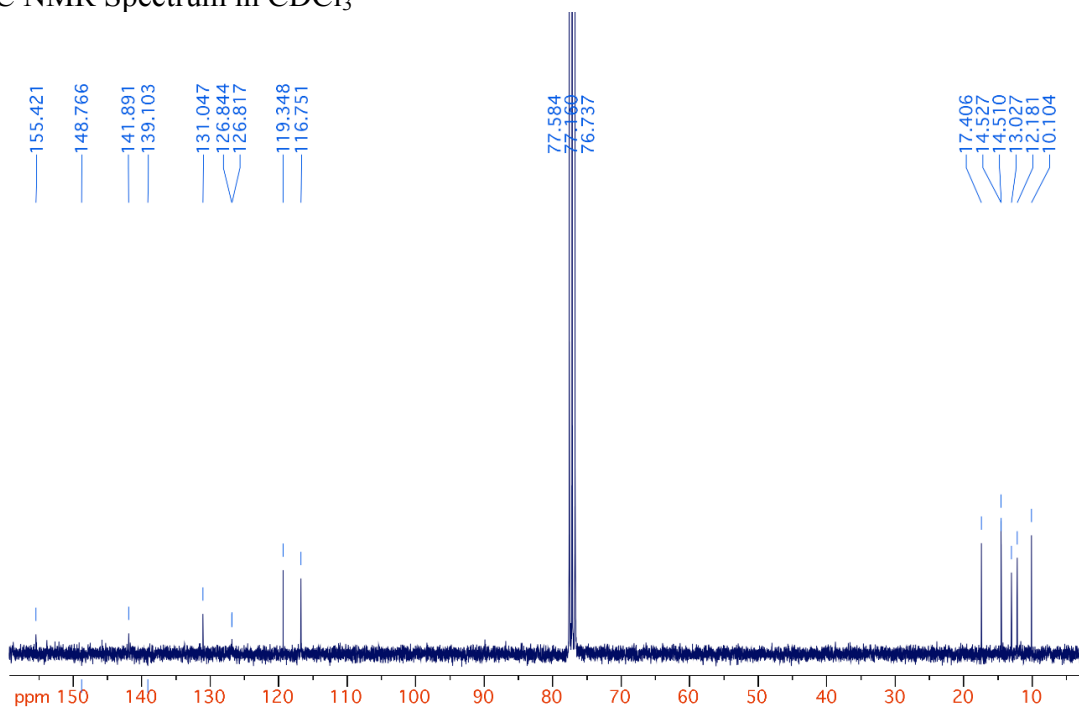

**(Z)-1-(2-((4-Heptanoyl-3,5-dimethyl-1H-pyrrol-2-yl)methylene)-3,5-dimethyl-2H-pyrrol-4-yl)heptan-1-one hydrochloride (2d)**

<sup>1</sup>H NMR Spectrum in CDCl<sub>3</sub>

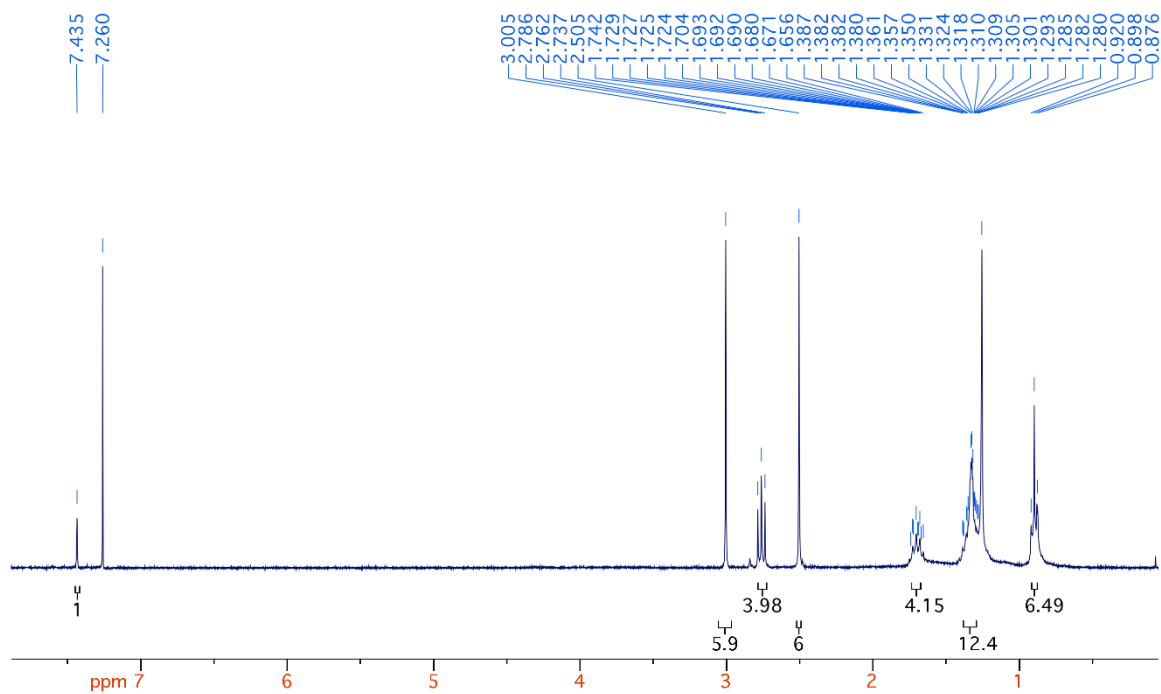

<sup>13</sup>C NMR Spectrum in CDCl<sub>3</sub>

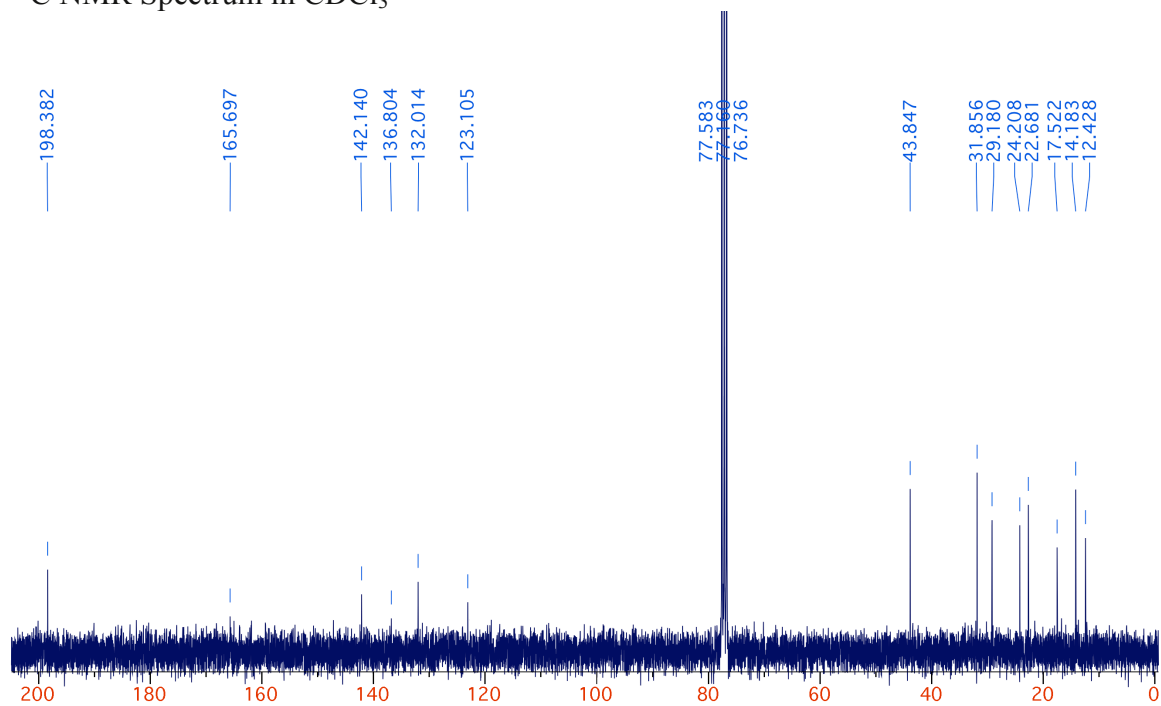

**(Z)-1-(2-((4-Acetyl-3,5-dimethyl-1H-pyrrol-2-yl)(phenyl)methylene)-3,5-dimethyl-2H-pyrrol-4-yl)ethanone hydrochloride (2e)**

<sup>1</sup>H NMR Spectrum in CDCl<sub>3</sub>

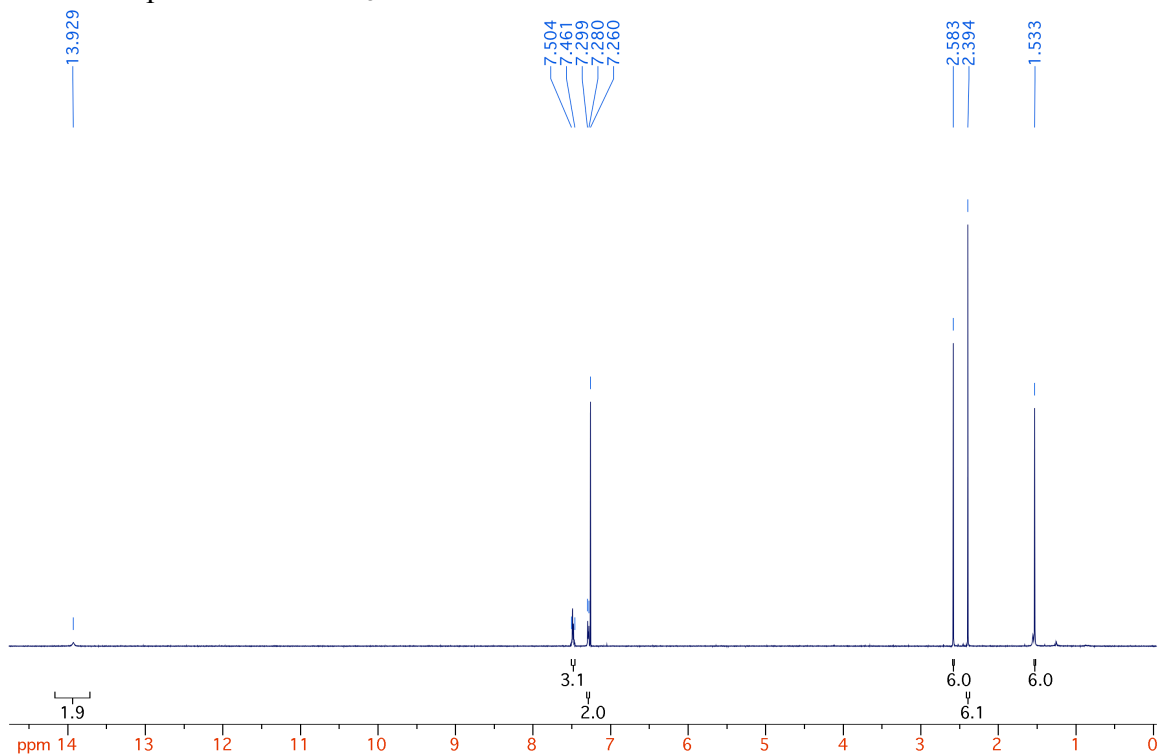

<sup>13</sup>C NMR Spectrum in CDCl<sub>3</sub>

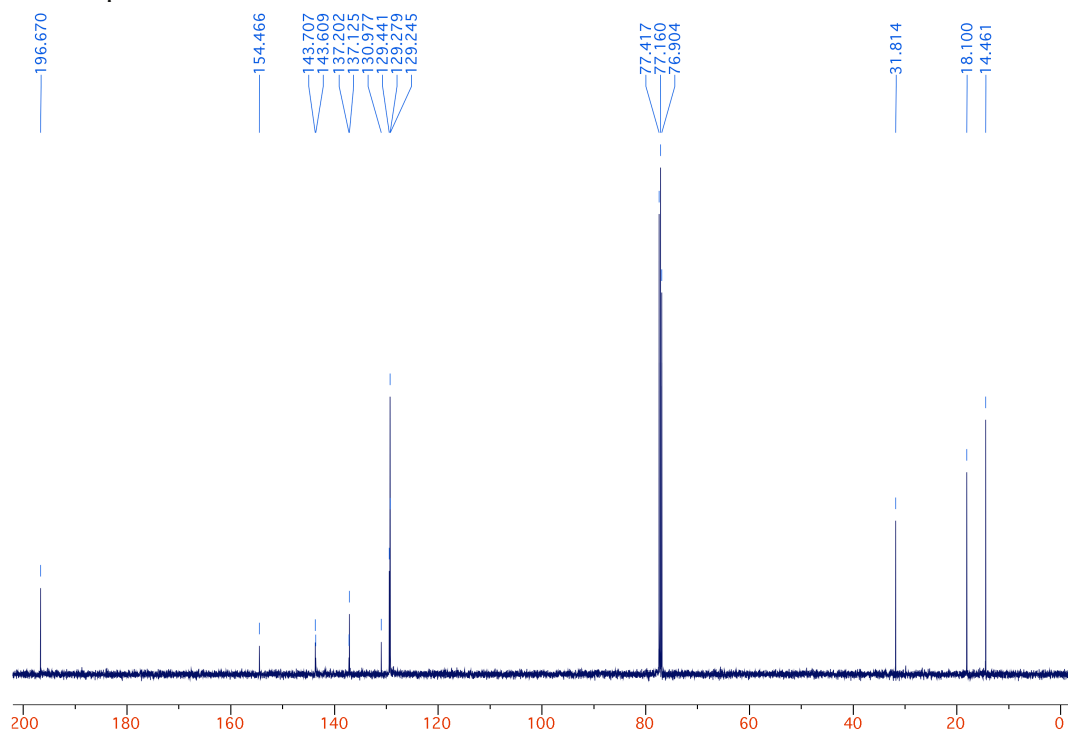

**(Z)-Ethyl 2-((3,4-dimethyl-1H-pyrrol-2-yl)methylene)-3-ethyl-5-methyl-2H-pyrrole-4-carboxylate hydrobromide (2g)**

<sup>1</sup>H NMR Spectrum in CDCl<sub>3</sub>

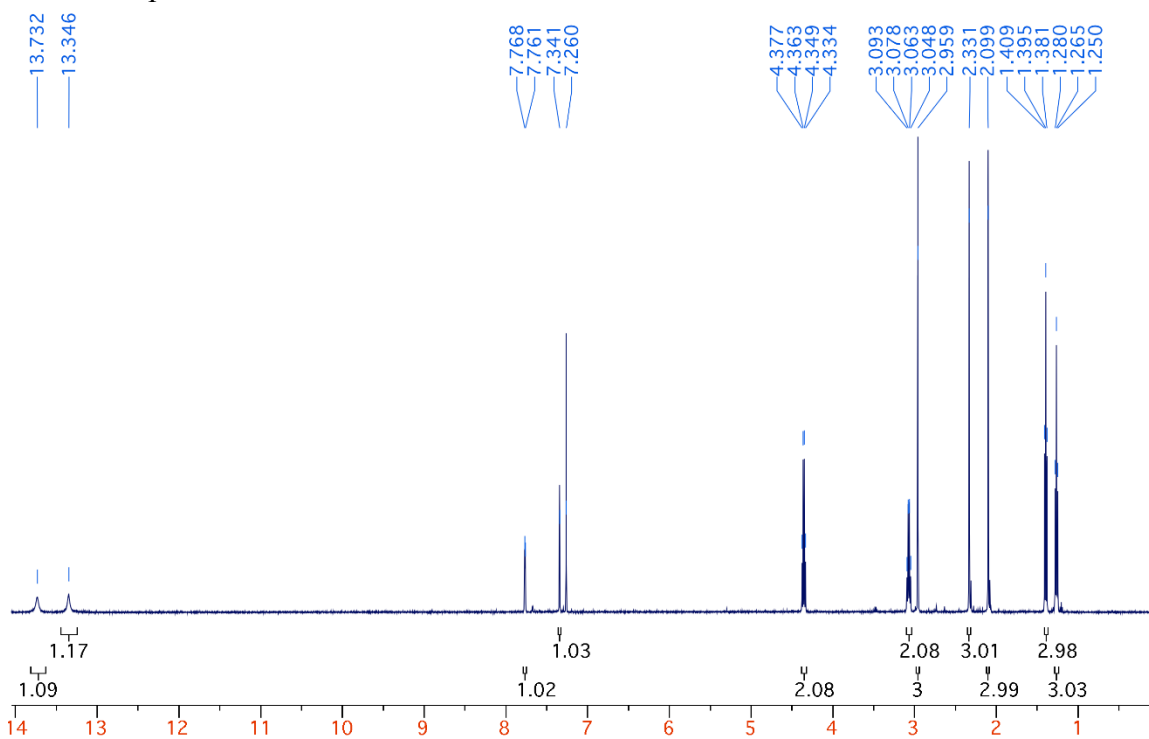

<sup>13</sup>C NMR Spectrum in CDCl<sub>3</sub>

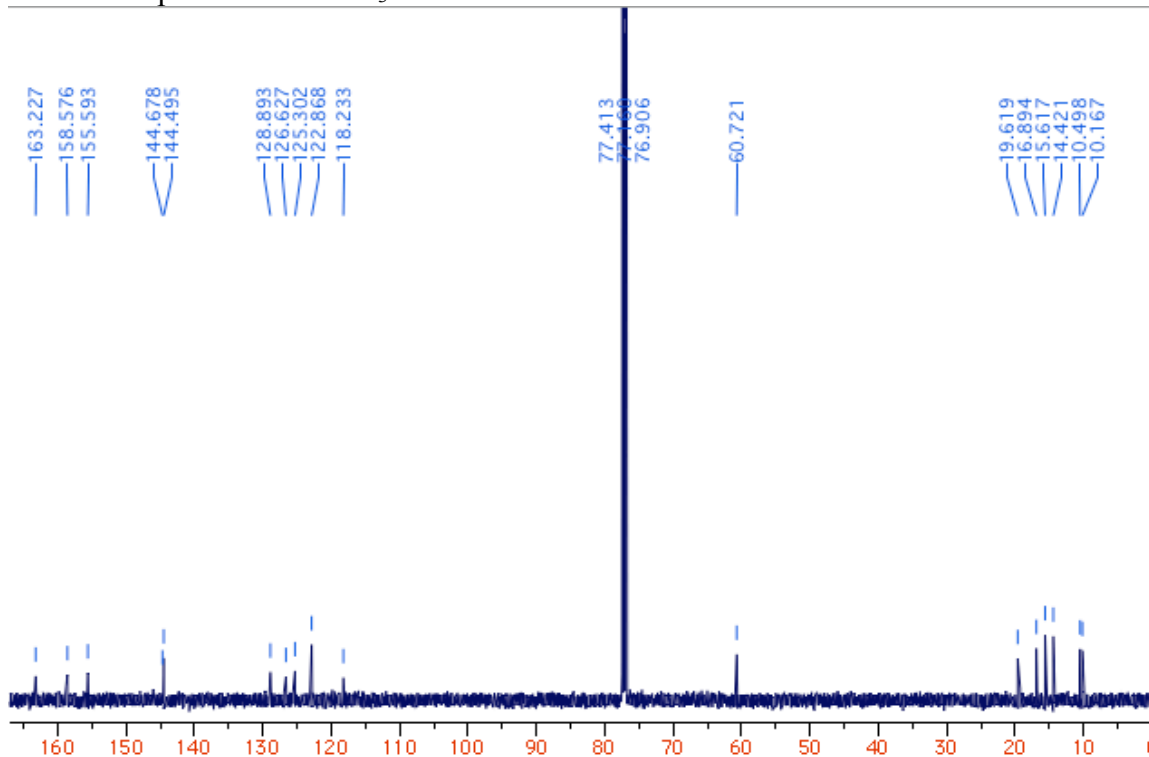

# 1,3,5,7-Tetramethyl-2,6-diethyl-8-*H*-4,4'-dibromo-bora-3a,4a-diaza-*s*-indacene (3a)

$^1\text{H}$  NMR Spectrum in  $\text{CDCl}_3$

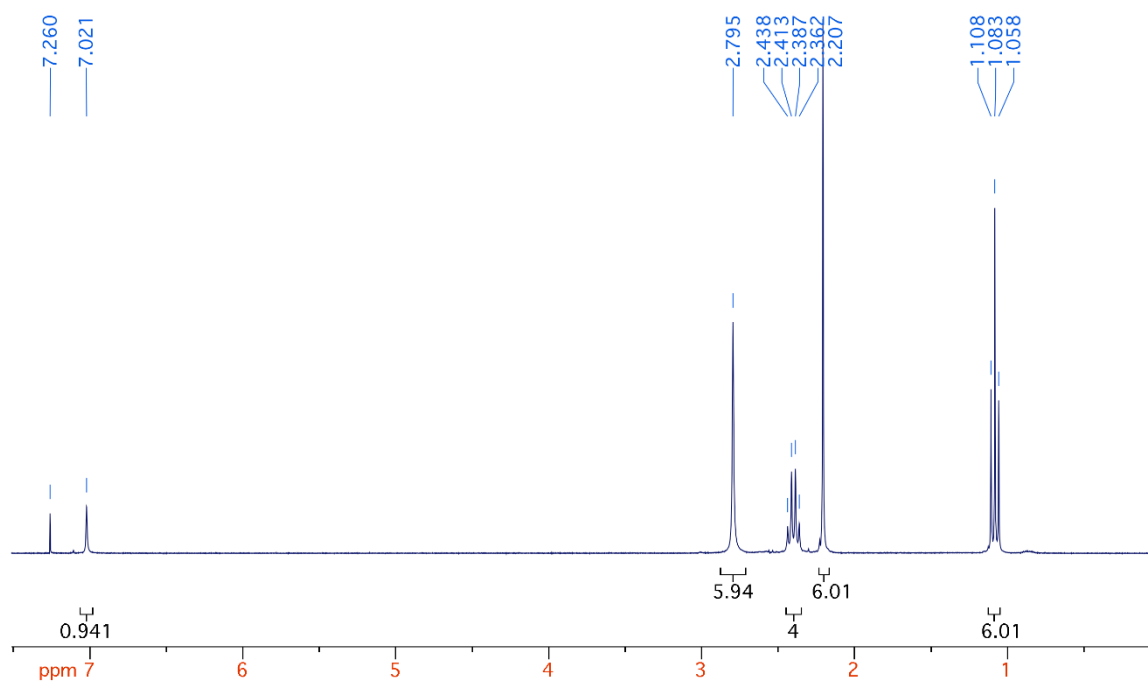

$^{13}\text{C}$  NMR Spectrum in  $\text{CDCl}_3$

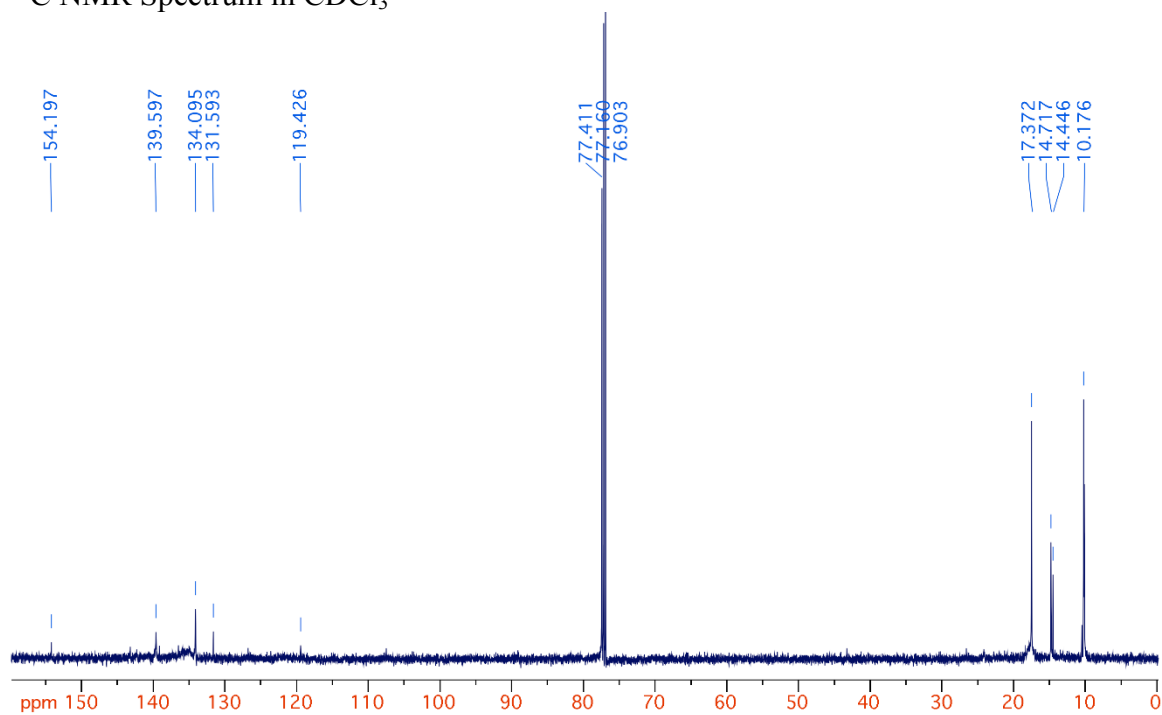

**(Z)-3-Ethyl-5-((4-ethyl-3,5-dimethyl-2H-pyrrol-2-ylidene)methyl)-2,4-dimethyl-1H-pyrrole tetrafluoroborate (4a)**

<sup>1</sup>H NMR Spectrum in CDCl<sub>3</sub>

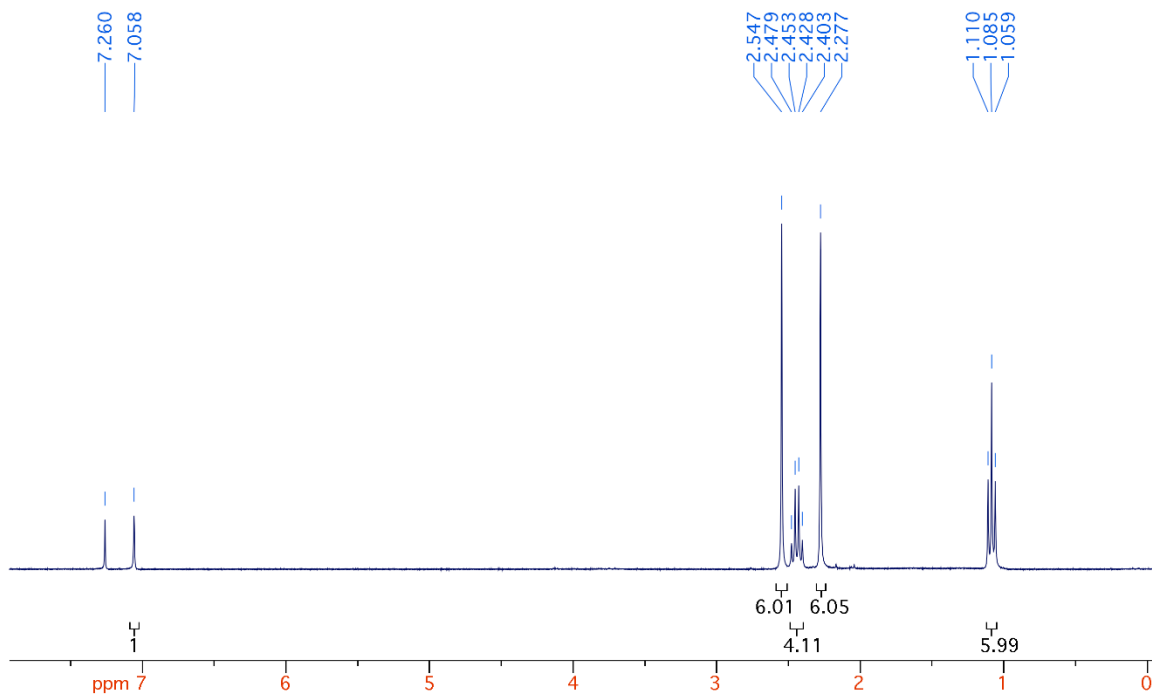

<sup>13</sup>C NMR Spectrum in CDCl<sub>3</sub>

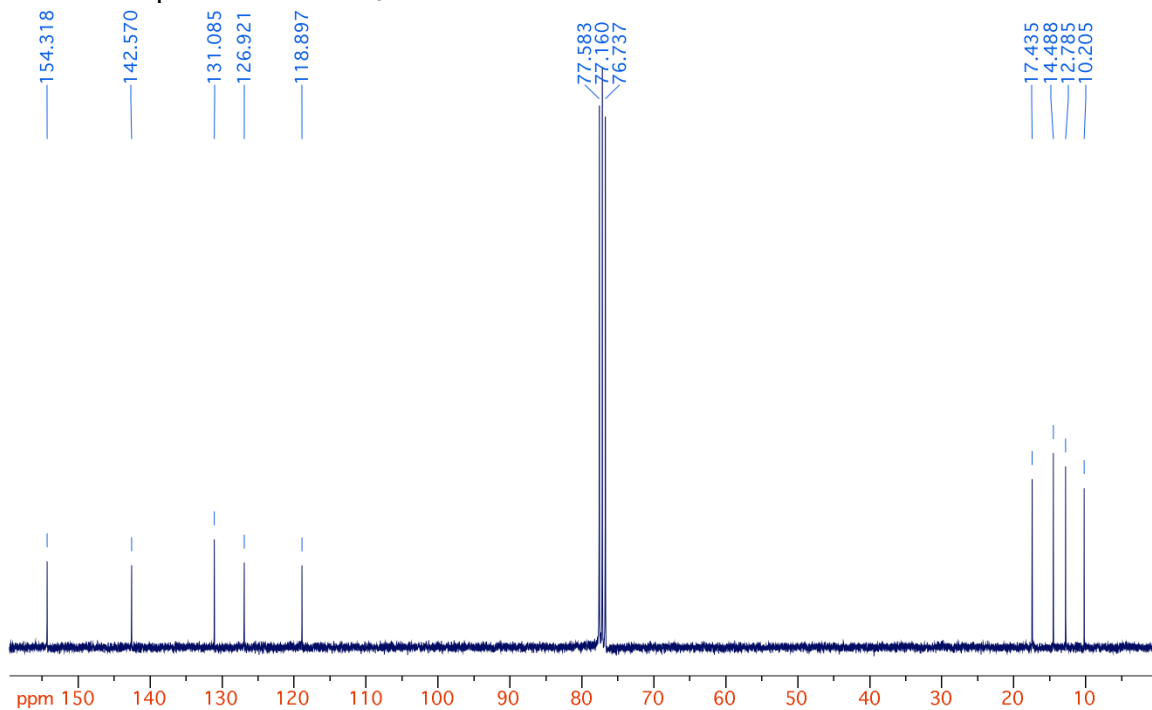



**(Z)-2-((4-Ethyl-3,5-dimethyl-2H-pyrrol-2-ylidene)methyl)-3,5-dimethyl-1H-pyrrole tetrafluoroborate (4b)**

<sup>1</sup>H NMR Spectrum in CDCl<sub>3</sub>

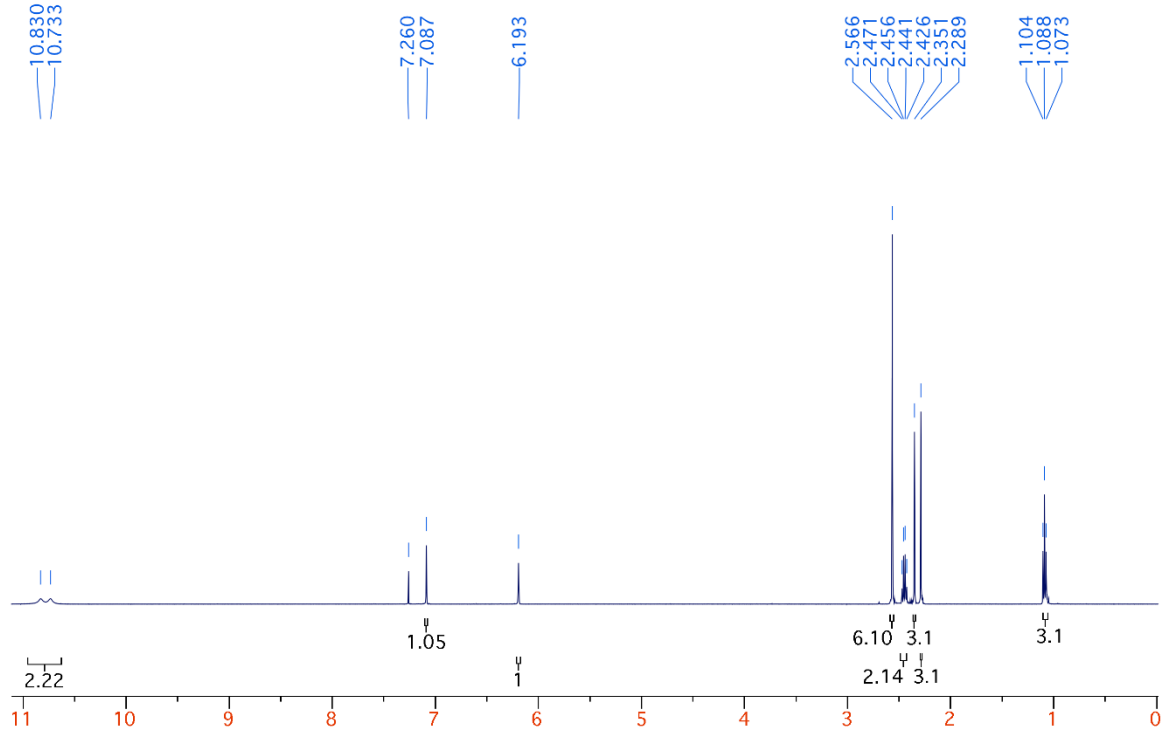

<sup>13</sup>C NMR Spectrum in CDCl<sub>3</sub>

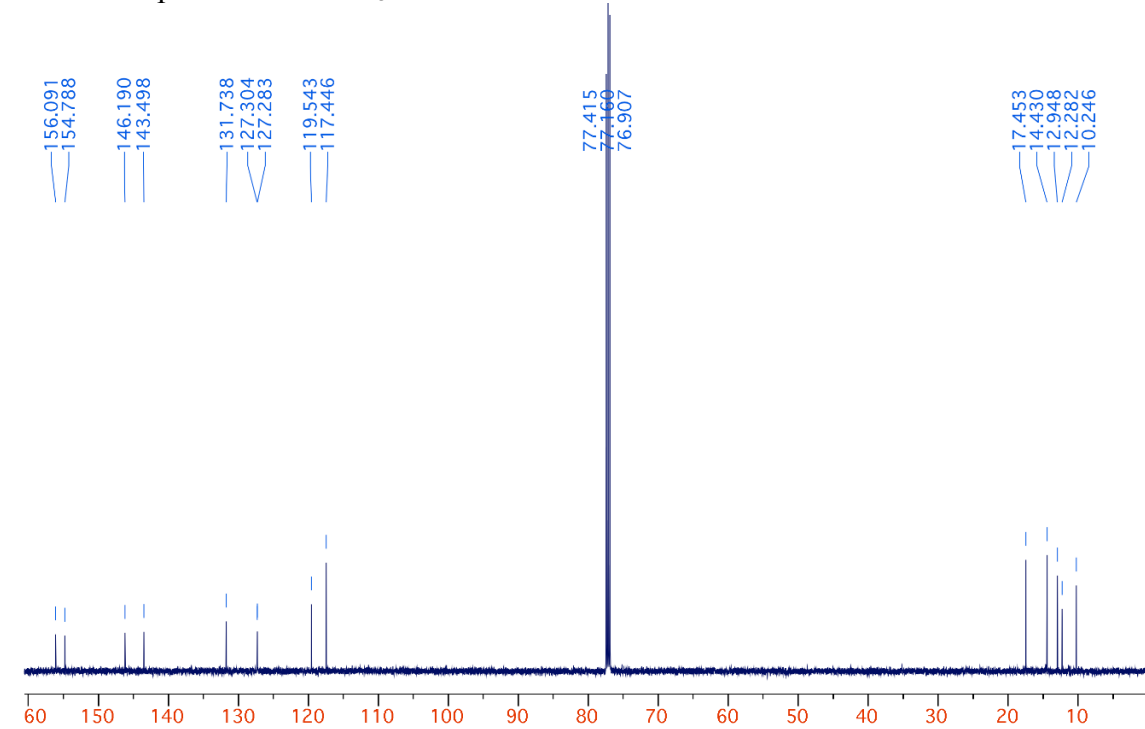

**(Z)-2-((3,5-Dimethyl-2H-pyrrol-2-ylidene)methyl)-3,5-dimethyl-1H-pyrrole  
tetrafluoroborate (4c)**

<sup>1</sup>H NMR Spectrum in CDCl<sub>3</sub>

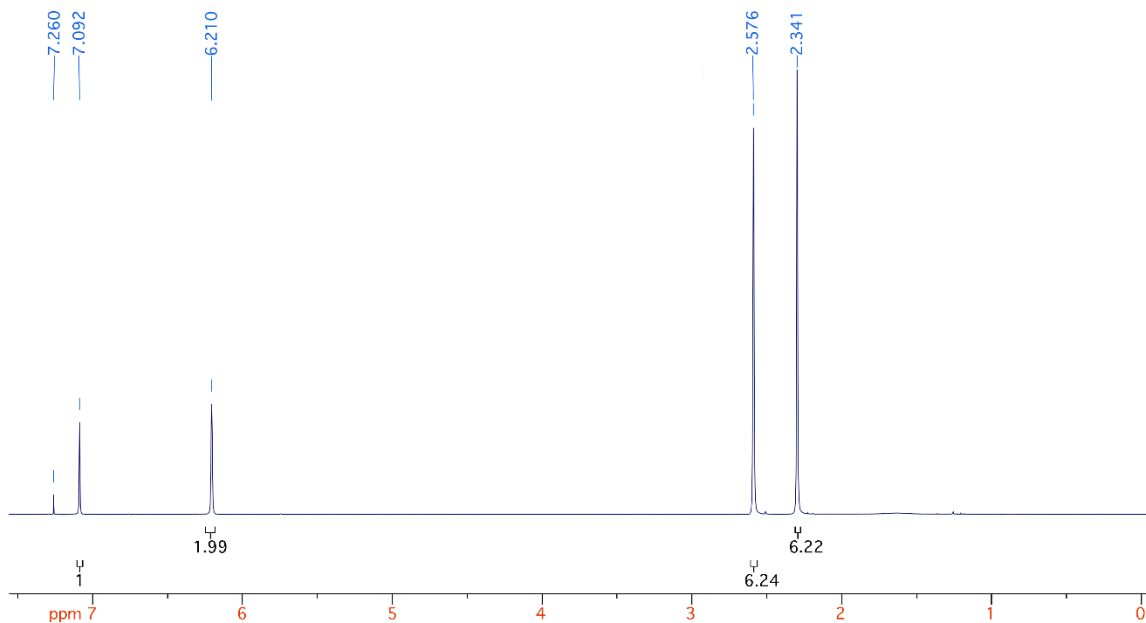

<sup>13</sup>C NMR Spectrum in CDCl<sub>3</sub>

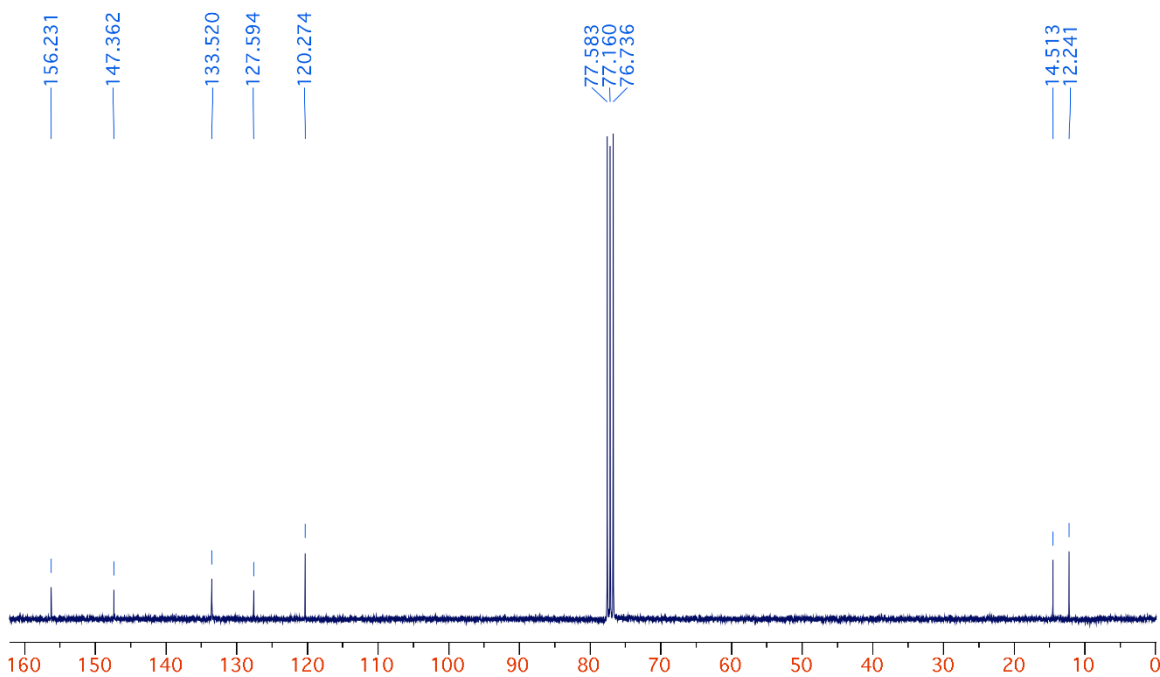

**(Z)-3-Ethyl-5-((4-ethyl-3,5-dimethyl-2H-pyrrol-2-ylidene)(phenyl)methyl)-2,4-dimethyl-1H-pyrrole tetrafluoroborate (4e)**

<sup>1</sup>H NMR Spectrum in CDCl<sub>3</sub>

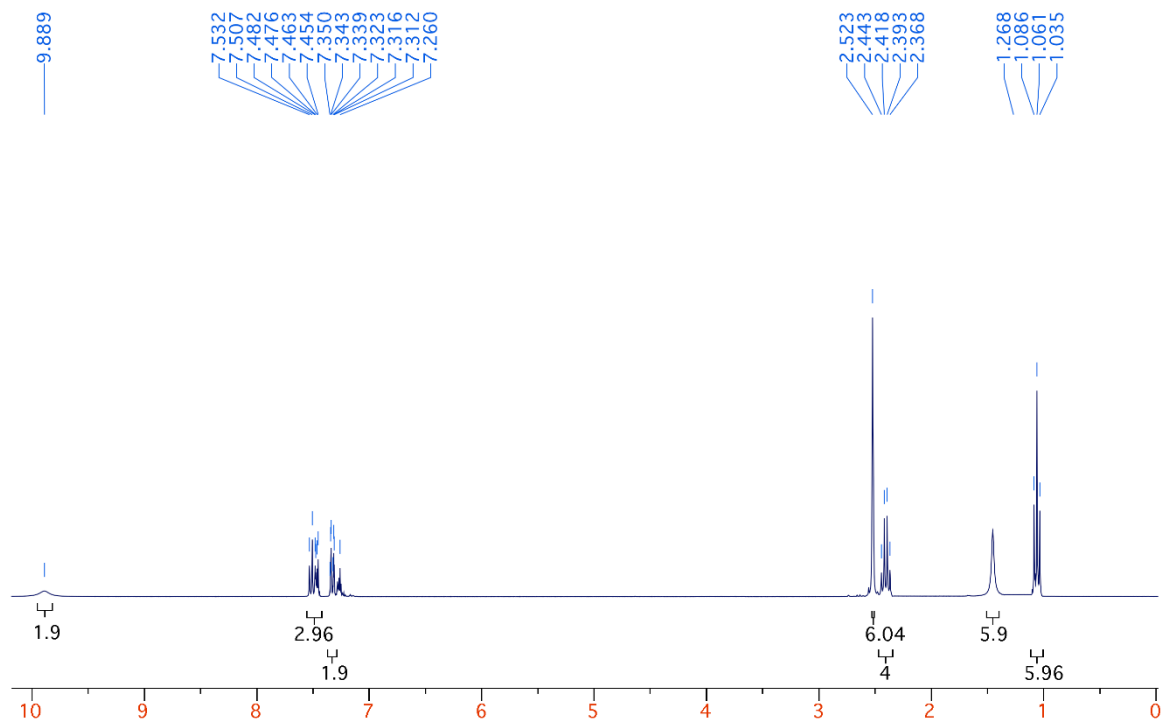

<sup>13</sup>C NMR Spectrum in CDCl<sub>3</sub>

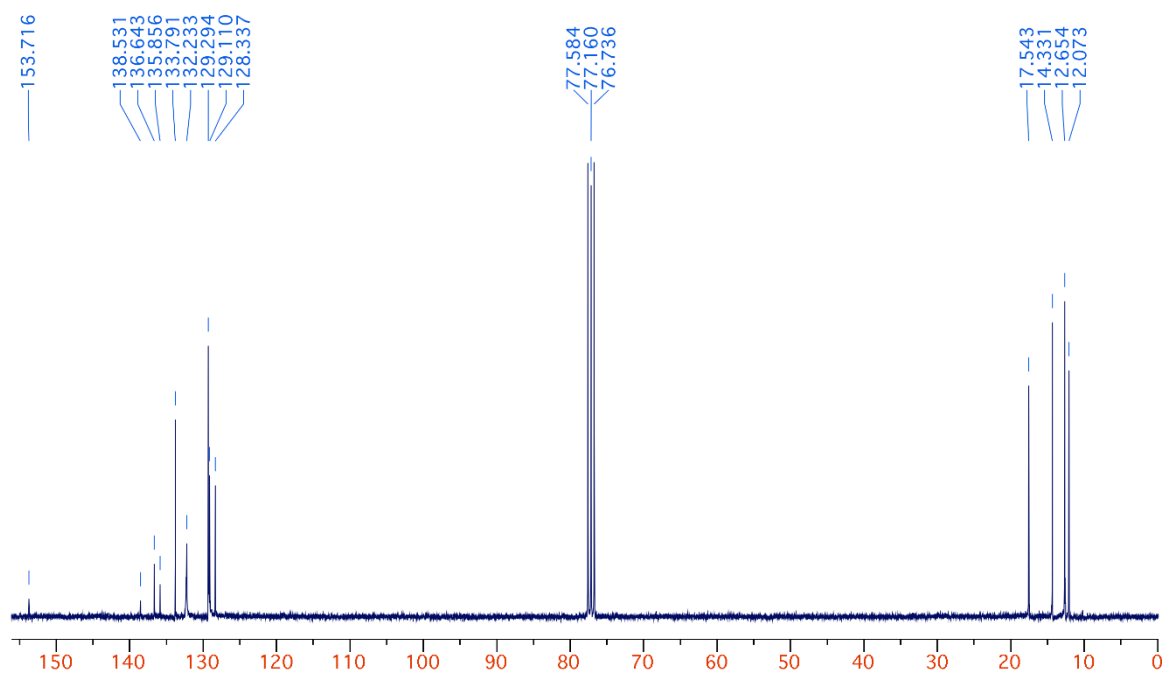

**(Z)-2-(Phenyl(2H-pyrrol-2-ylidene)methyl)-1H-pyrrole tetrafluoroborate (4h)**

<sup>1</sup>H NMR Spectrum in CDCl<sub>3</sub>

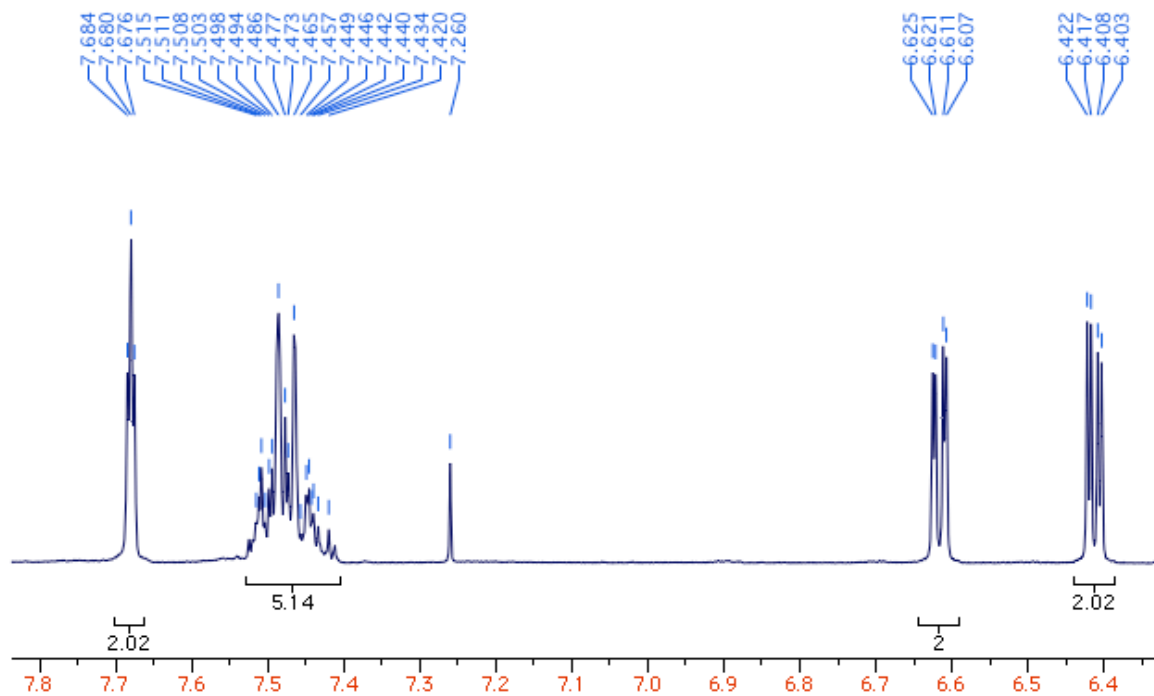

<sup>13</sup>C NMR Spectrum in CDCl<sub>3</sub>

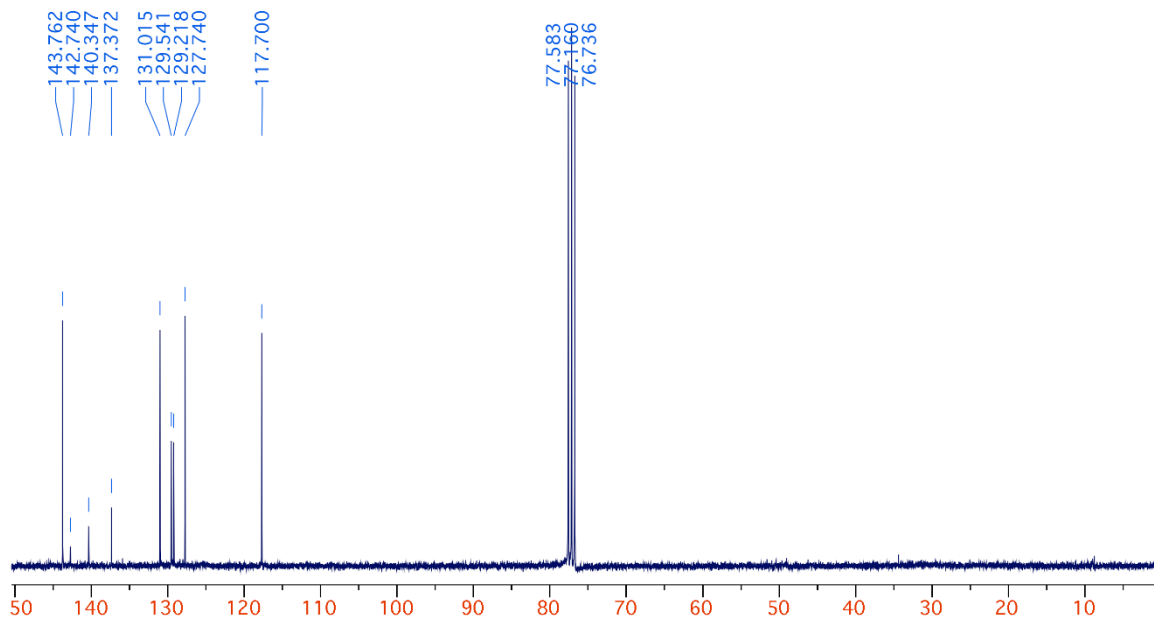

Supplement: c4cc02706j1.pdf [file c4cc02706j1.pdf]
